# Supplementary material for: Placental rescue reveals a sole requirement for c-Myc in embryonic erythroblast survival and hematopoietic stem cell function
Source: Oxford University Press journal article supplement (doi:10.1242/dev.022707), 2008-06-13
Supplement: dev022707-tables1.pdf [file dev022707-tables1.pdf]

**Table S1.**

|                          |                      | <i>c-myc</i> <sup>flox/+</sup> | <i>Sox2Cre</i> ;<br><i>c-myc</i> <sup>flox/+</sup> | <i>c-myc</i> <sup>flox2</sup> | <i>Sox2Cre</i> ;<br><i>c-myc</i> <sup>flox2</sup> |
|--------------------------|----------------------|--------------------------------|----------------------------------------------------|-------------------------------|---------------------------------------------------|
| Expected frequencies (%) |                      | 25                             | 25                                                 | 25                            | <b>25</b>                                         |
| <b>E10.5</b>             | Embryos ( <i>n</i> ) | 30                             | 26                                                 | 16                            | 19                                                |
|                          | %                    | 33                             | 28.5                                               | 17.6                          | <b>20.9</b>                                       |
| <b>E11.5</b>             | Embryos ( <i>n</i> ) | 19                             | 22                                                 | 18                            | 16*                                               |
|                          | %                    | 25.3                           | 29.3                                               | 24                            | <b>21.4</b>                                       |
| <b>E12.5</b>             | Embryos ( <i>n</i> ) | 2                              | 1                                                  | 3                             | 2 (dead)                                          |
|                          | %                    | 25                             | 12.5                                               | 37.5                          | <b>25</b>                                         |
| <b>E13.5</b>             | Embryos ( <i>n</i> ) | 4                              | 4                                                  | 5                             | 0                                                 |
|                          | %                    | 30.8                           | 30.8                                               | 38.4                          | <b>0</b>                                          |
| <b>E14.5</b>             | Embryos ( <i>n</i> ) | 1                              | 3                                                  | 1                             | 0                                                 |
|                          | %                    | 20                             | 60                                                 | 20                            | <b>0</b>                                          |
| <b>Newborns</b>          | Embryos ( <i>n</i> ) | 9                              | 7                                                  | 12                            | 0                                                 |
|                          | %                    | 32.1                           | 25                                                 | 42.9                          | <b>0</b>                                          |

\*Most embryos at E11.5 appeared morphologically normal, but lacked a visible heartbeat in about 50% of the embryos, suggesting that lethality occurs around this time point.
